# Supplementary material for: Overexpression of a Vesicle Trafficking Gene, OsRab7, Enhances Salt Tolerance in Rice
Source: Hindawi journal article supplement (doi:10.1155/2014/483526), 2014-01-01

**Additional file** The *OsRab7* transform cassette, and PCR confirmed the transgenic rice.

(a) The *OsRab7* cassette for rice transformation with the *OsRab7* gene under the control of the ubiquitin promoter. Pubi: the maize ubiquitin promoter. (b) PCR amplification of 0.75kb of the hpt expression cassette. M DL2000 maker. 0 untransformed control rice sample; 1-23 represent the putative transformed samples.

**a**

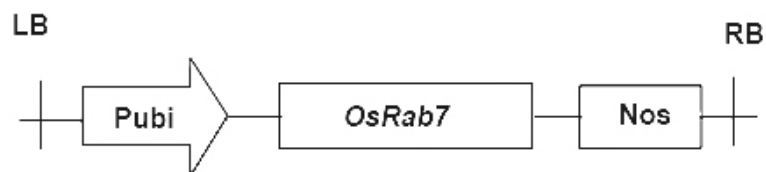

**b**

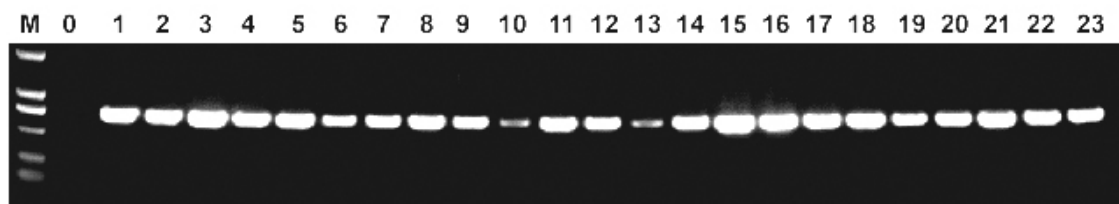

Supplement: f1 [file 483526.f1.pdf]
